# Supplementary material for: Zirconium-based metal–organic framework loaded agarose hydrogels for fluorescence turn-on detection of nerve agent simulant vapor
Source: Royal Society of Chemistry journal article supplement (doi:10.1039/d3ay01539d), 2023-01-01
Supplement: d3ay01539d1.pdf [file d3ay01539d1.pdf]

# **Zirconium-based metal-organic framework loaded agarose hydrogels for fluorescence turn-on detection of nerve agent simulant vapor**

You Lei,<sup>a</sup> Yuting Gao,<sup>a</sup> Yi Xiao,<sup>a</sup> Pengcheng Huang,<sup>\*ab</sup> and Fang-Ying Wu<sup>\*ab</sup>

<sup>a</sup>School of Chemistry and Chemical Engineering, Nanchang University,  
Nanchang, 330031, China

<sup>b</sup>Jiangxi Province Key Laboratory of Modern Analytical Science, Nanchang  
University, Nanchang, 330031, China

\*Corresponding Authors: Pengcheng Huang, [pchuang@ncu.edu.cn](mailto:pchuang@ncu.edu.cn), Fang-Ying  
Wu, [fywu@ncu.edu.cn](mailto:fywu@ncu.edu.cn).

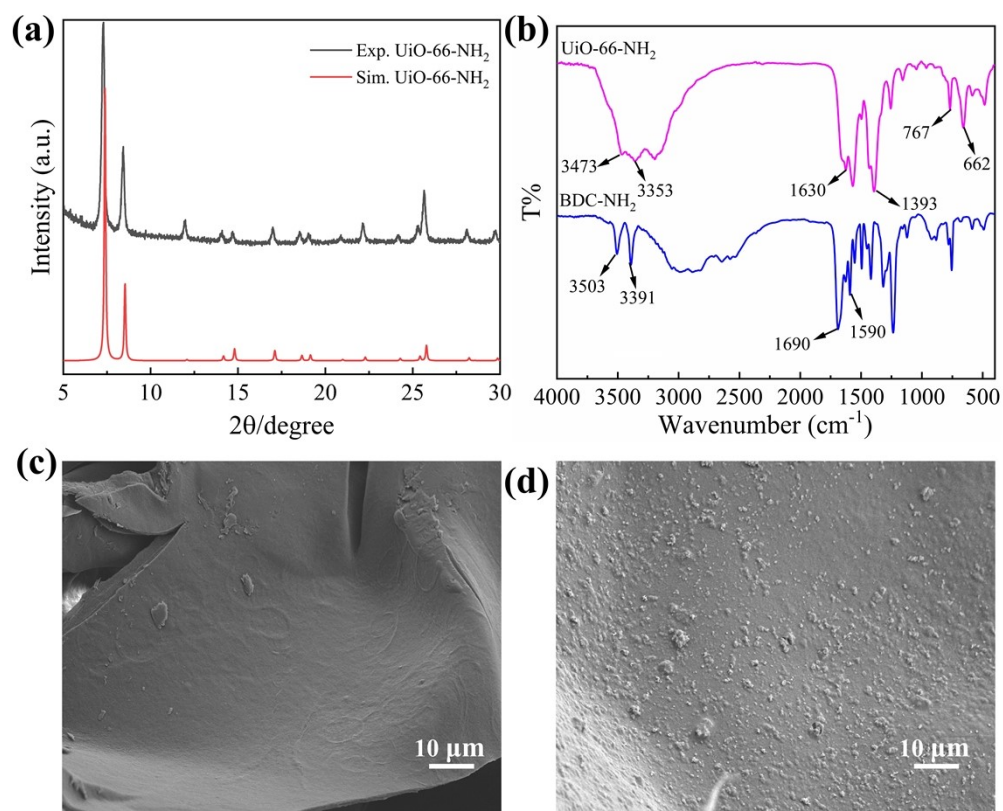

Fig. S1. (a) PXRD patterns of UiO-66-NH<sub>2</sub> and simulated UiO-66-NH<sub>2</sub>, (b) FT-IR plots of UiO-66-NH<sub>2</sub> and BDC-NH<sub>2</sub>, (c) SEM image of Aga hydrogel, (d) SEM image of UiO-66-NH<sub>2</sub>@Aga.

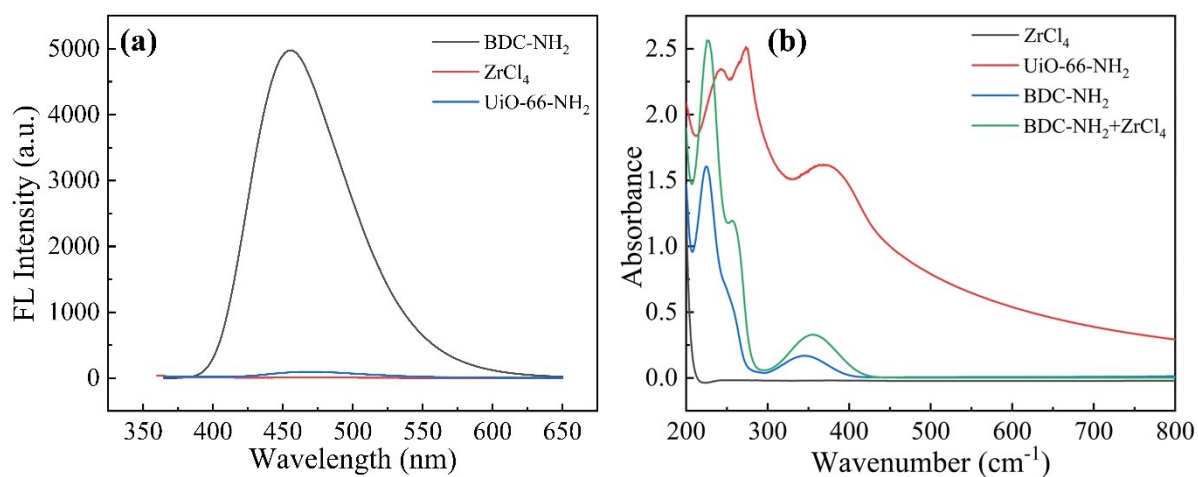

Fig. S2. Fluorescence spectra of (a) BDC-NH<sub>2</sub>, ZrCl<sub>4</sub> and UiO-66-NH<sub>2</sub>, (b) UV-vis absorption spectra of ZrCl<sub>4</sub>, UiO-66-NH<sub>2</sub>, BDC-NH<sub>2</sub> and BDC-NH<sub>2</sub>+ZrCl<sub>4</sub>.

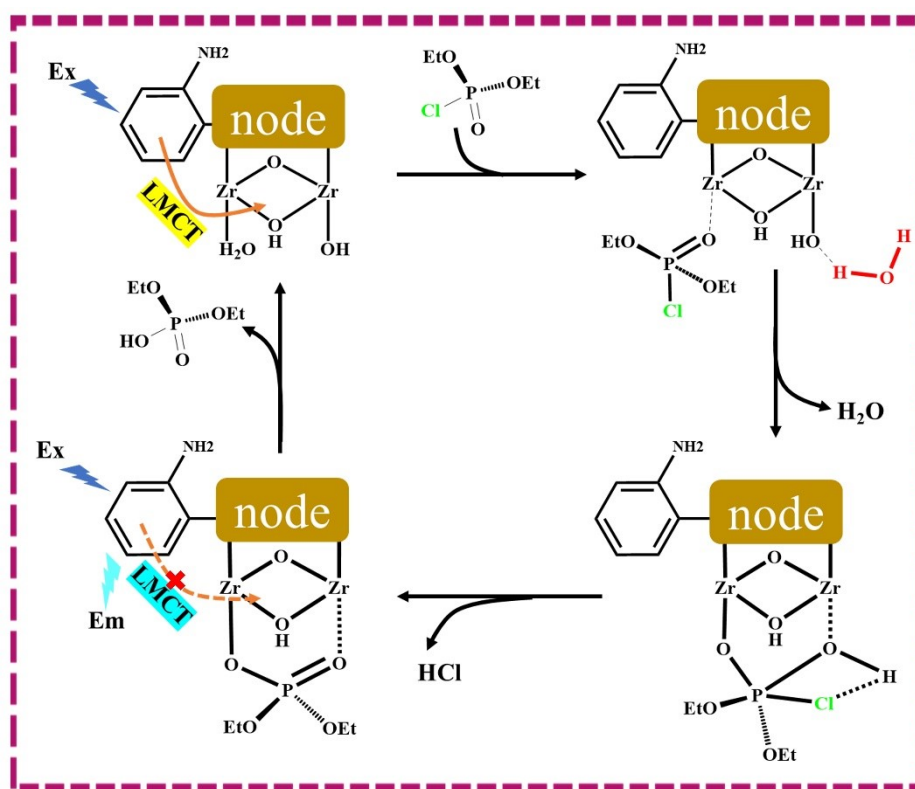

Fig. S3. The reaction process of UiO-66-NH<sub>2</sub> with DCP and the mechanism of LMCT process change.

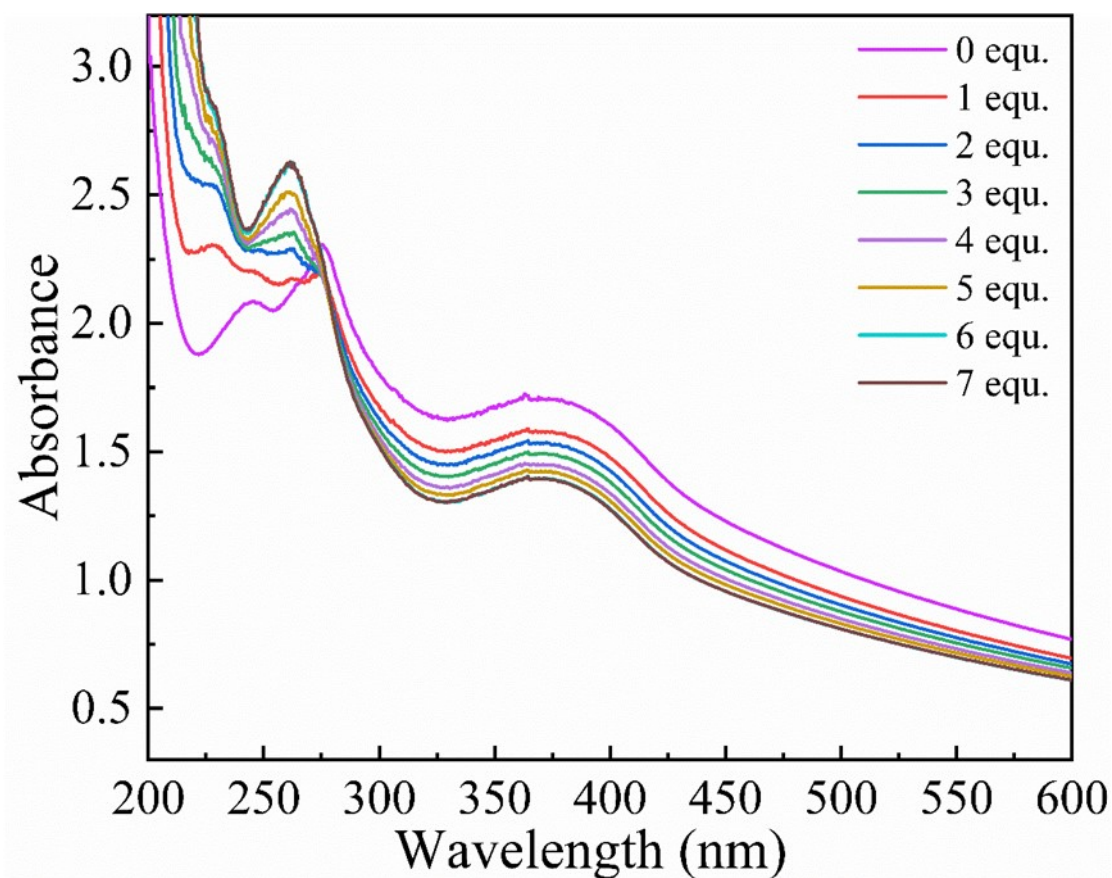

Fig. S4. UV-vis titration experiment with DCP.

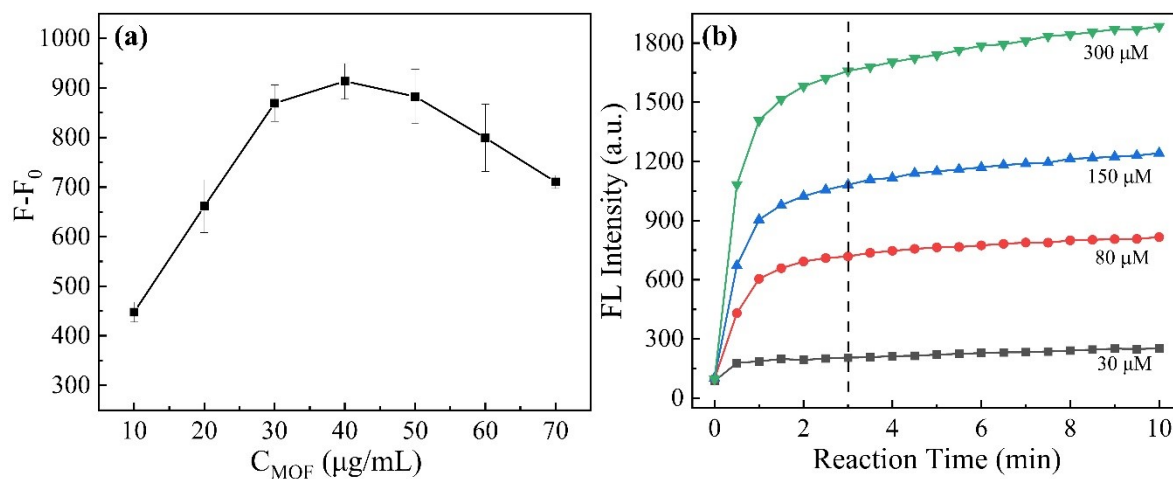

Fig. S5. Optimization of the conditions for UiO-66-NH<sub>2</sub> detection of DCP concentration in aqueous solution (a) UiO-66-NH<sub>2</sub> concentration, (b) Reaction time.

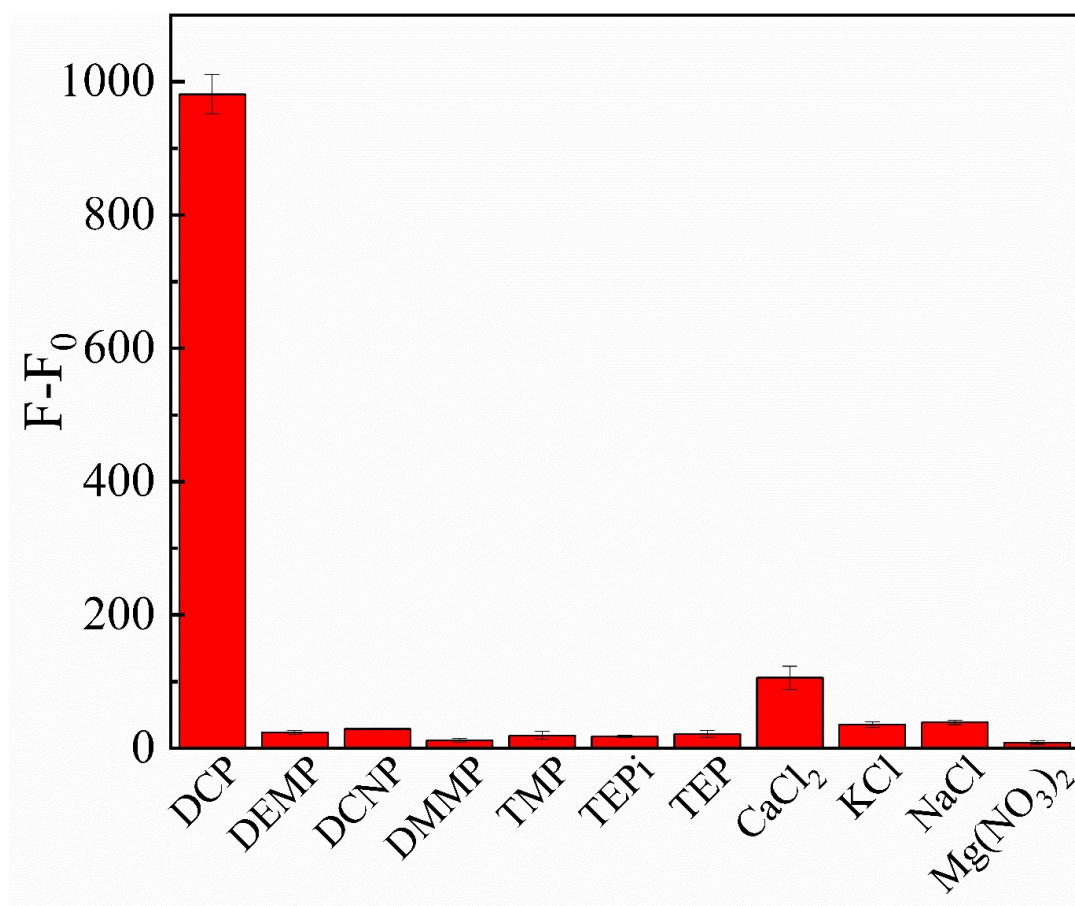

Fig. S6. Selective experiments for possible distractors in the aqueous phase.

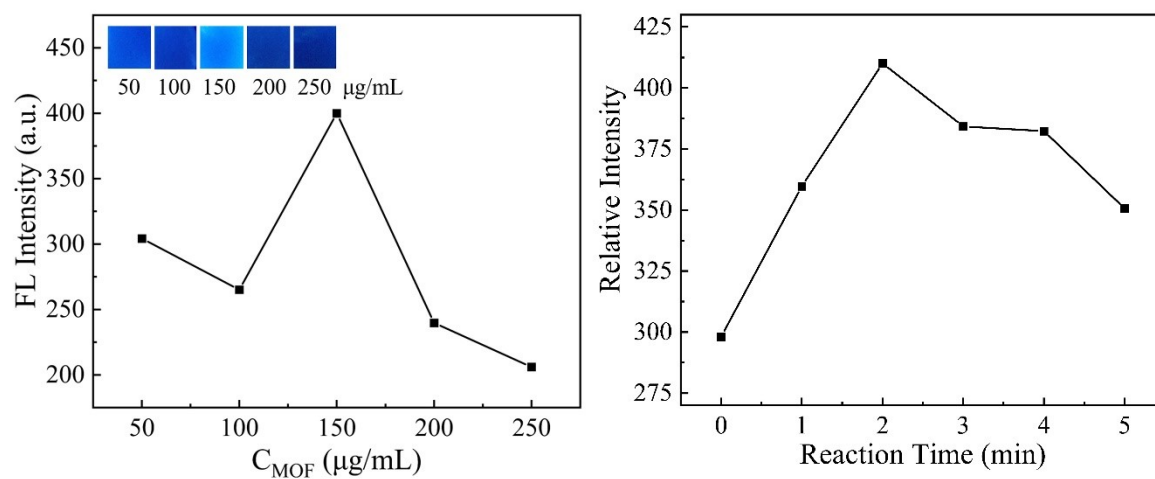

Fig. S7. Optimization of conditions for the reaction of UiO-66-NH<sub>2</sub>@Aga with DCP vapor (a) UiO-66-NH<sub>2</sub> concentration, (b) Reaction time.
